# Supplementary material for: Random laser oscillation from an organic fluorescent dye loaded inside a porous zirconia medium
Source: Royal Society of Chemistry journal article supplement (doi:10.1039/d1ra05791j), 2021-01-01
Supplement: d1ra05791j1.pdf [file d1ra05791j1.pdf]

## Supporting Information

**Title: Random Laser Oscillation from Organic Fluorescent Dye Loaded Inside Porous Zirconia Medium**

Authors: Yukari Sakurayama<sup>1</sup>, Tsunenobu Onodera<sup>1\*</sup>, Yasuyuki Araki<sup>1</sup>, Takehiko Wada<sup>1</sup>, and Hidetoshi Oikawa<sup>1,2</sup>

*<sup>1</sup>Institute of Multidisciplinary Research for Advanced Materials (IMRAM), Tohoku University, Katahira 2-1-1, Aoba-ku, Sendai 980-8755, Japan*

*<sup>2</sup>Professor Emeritus, Tohoku University*

\*Author for correspondence: [tsunenobu.onodera.a4@tohoku.ac.jp](mailto:tsunenobu.onodera.a4@tohoku.ac.jp)

**Table S1** Preparation conditions of polystyrene microparticles (PS MPs) (Sample codes: PS1 to PS5).

| <b>Sample code</b> | <b>NaPPS [mM]</b> | <b>H<sub>2</sub>O [mL]</b> | <b>EtOH [mL]</b> |
|--------------------|-------------------|----------------------------|------------------|
| <b>PS1</b>         | <b>2.0</b>        | <b>139</b>                 | <b>15</b>        |
| <b>PS2</b>         | <b>2.0</b>        | <b>124</b>                 | <b>30</b>        |
| <b>PS3</b>         | <b>2.0</b>        | <b>109</b>                 | <b>45</b>        |
| <b>PS4</b>         | <b>0.0</b>        | <b>149</b>                 | <b>5.0</b>       |
| <b>PS5</b>         | <b>0.0</b>        | <b>154</b>                 | <b>0.0</b>       |

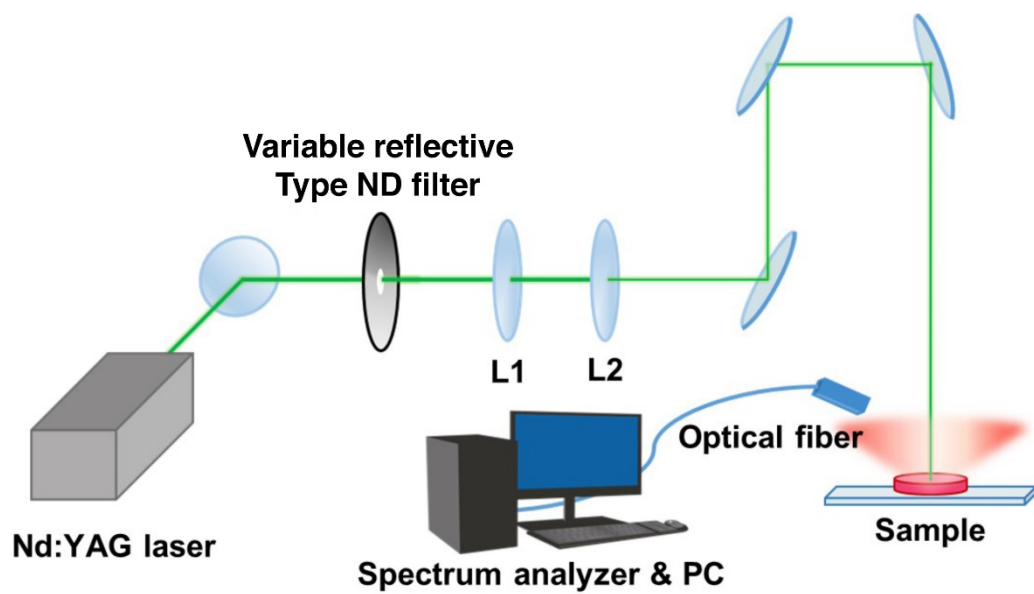

**Fig. S1** Scheme of optical system to measure emission spectrum. The detailed specifications should be referred to the Text.

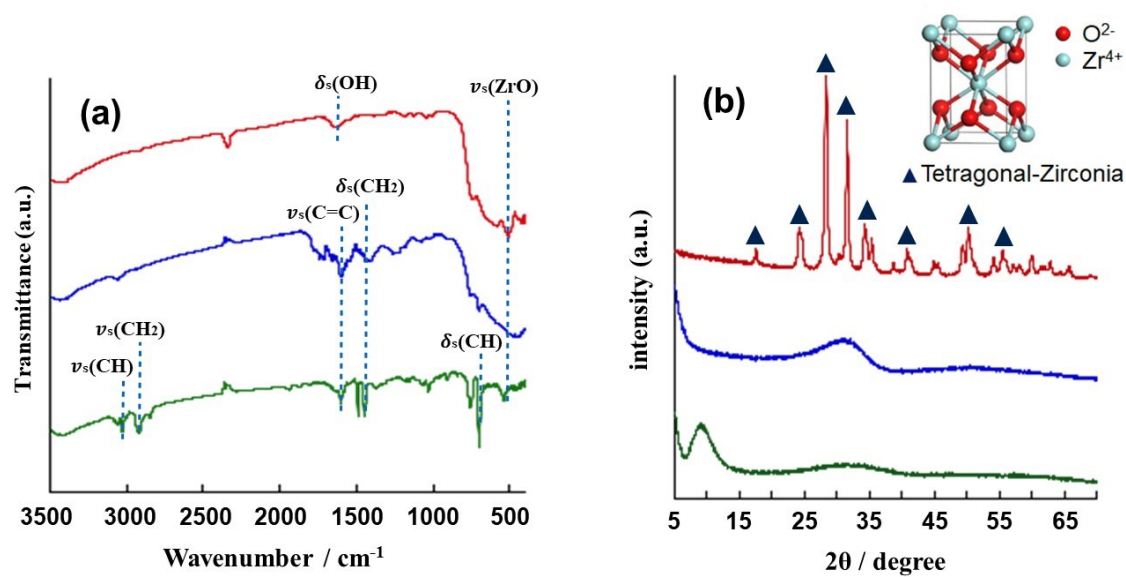

**Fig. S2** Changes of (a) FT-IR spectra and (b) powder XRD patterns with the formation process of PZrM calcinated at the elevated temperature. Green line: 75°C, blue line: 350°C, and red line: 580°C.

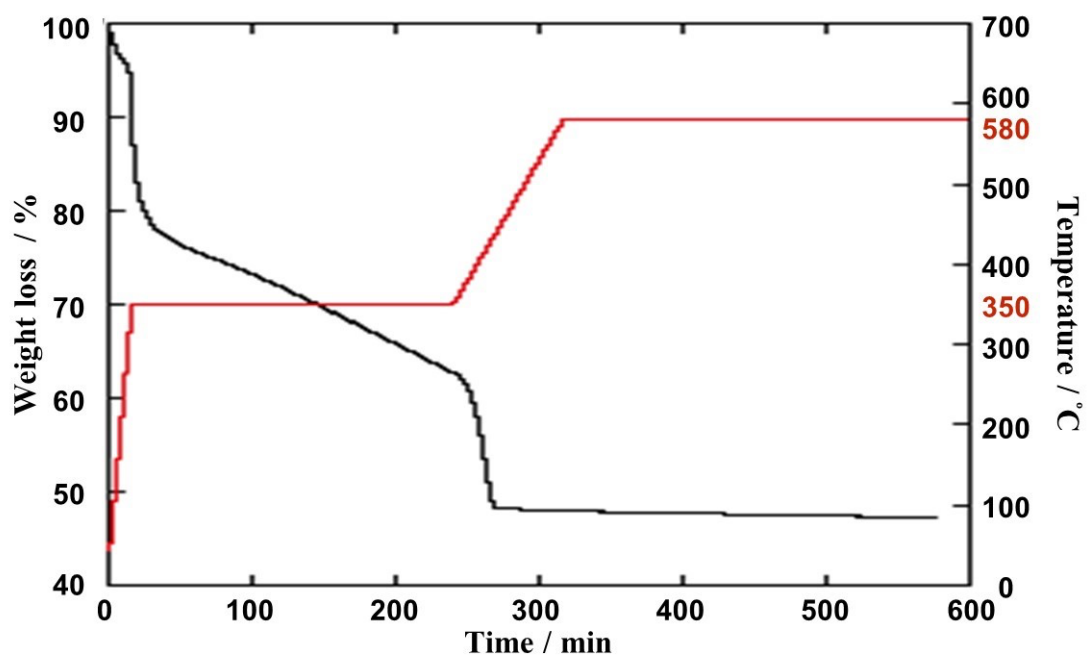

**Fig. S3** TGA data at the calcination process with increasing temperature so as to convert into PZrM. Red line: temperature, and black line: weight loss.

(a)

Z5: 1 MW cm<sup>-2</sup>

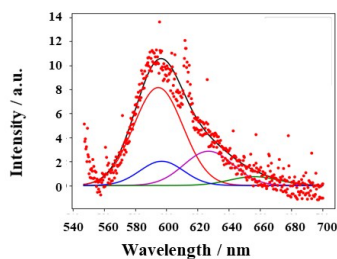

Z5: 10 MW cm<sup>-2</sup>

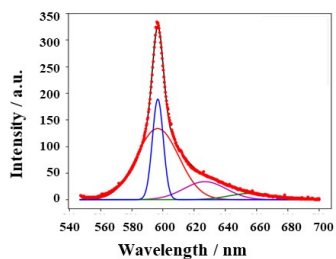

Z5: 26 MW cm<sup>-2</sup>

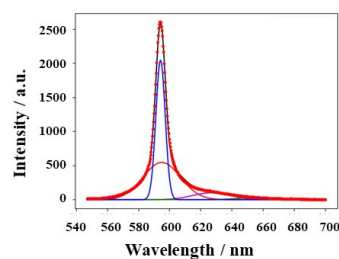

(b)

RhB Soln.: 1 MW cm<sup>-2</sup>

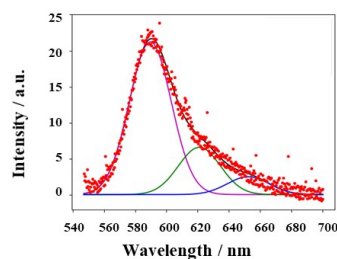

RhB Soln.: 10 MW cm<sup>-2</sup>

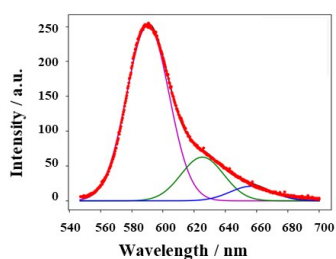

RhB Soln.: 26 MW cm<sup>-2</sup>

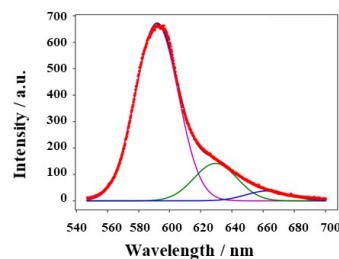

**Fig. S4** Examples of the spectrum decomposition in the emission spectra from (a) RhB (1.5 mM, 10  $\mu$ L) loaded inside PZM5 (1.5 mg), *i.e.*, Z5 (1.5 mg) and also from (b) RhB solution (1.5 mM) in order to separate laser oscillation peak by using Gaussian function. The excitation light intensities were 1, 10, and 26 MW cm<sup>-2</sup> in any case of Figs. S4(a) and S4(b).

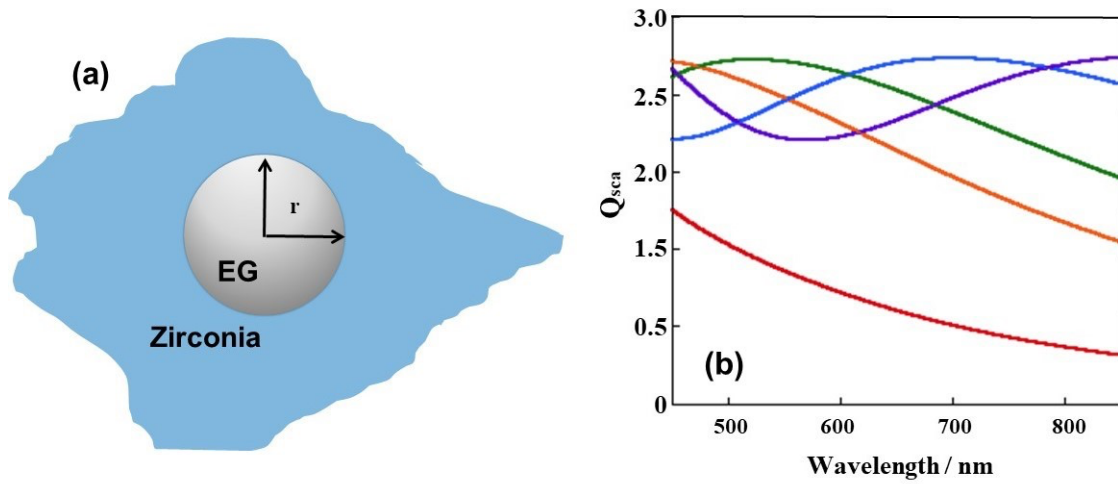

**Fig. S5** (a) Schematic picture of optically structural model for PZrM, and (b) the corresponding wavelength dispersion of scattering efficiency ( $Q_{sca}$ ) simulated at the various radius ( $r$ ) on the basis of Mie scattering theory. Red line:  $r = 105$  nm, orange line:  $r = 190$  nm, green line:  $r = 235$  nm, blue line:  $r = 325$  nm, and violet line:  $r = 420$  nm.

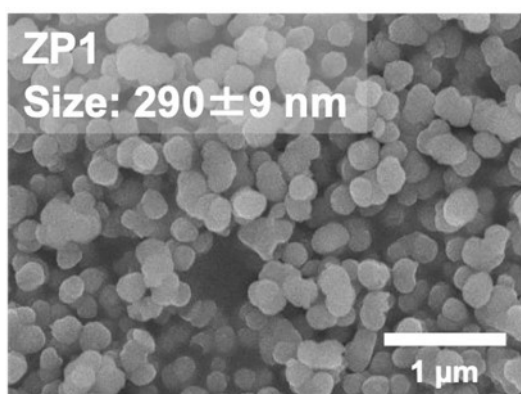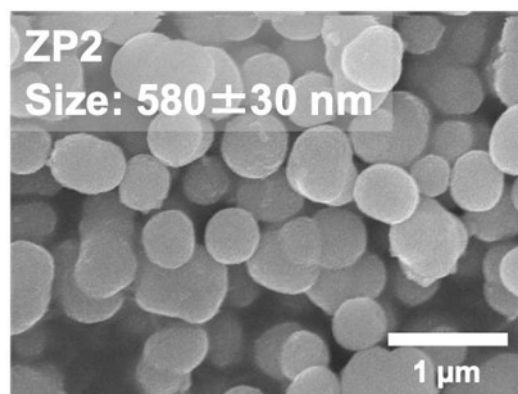

**Fig. S6** SEM images of zirconia microparticles (Zr MPs) (Sample codes: ZP1 and ZP2). The particle sizes of ZP1 and ZP2 are  $290 \pm 9$  nm and  $580 \pm 30$  nm, respectively, which were the average values calculated from 100 of specimens taken in SEM images.
