# Supplementary material for: Random laser oscillation from an organic fluorescent dye loaded inside a porous zirconia medium
Source: Royal Society of Chemistry journal article supplement (doi:10.1039/d1ra05791j), 2021-01-01
Supplement: d1ra05791j2.pdf [file d1ra05791j2.pdf]

| <b>Sample code</b> | <b>NaPPS [mM]</b> | <b>H<sub>2</sub>O [mL]</b> | <b>EtOH [mL]</b> |
|--------------------|-------------------|----------------------------|------------------|
| <b>PS1</b>         | <b>2.0</b>        | <b>139</b>                 | <b>15</b>        |
| <b>PS2</b>         | <b>2.0</b>        | <b>124</b>                 | <b>30</b>        |
| <b>PS3</b>         | <b>2.0</b>        | <b>109</b>                 | <b>45</b>        |
| <b>PS4</b>         | <b>0.0</b>        | <b>149</b>                 | <b>5.0</b>       |
| <b>PS5</b>         | <b>0.0</b>        | <b>154</b>                 | <b>0.0</b>       |

**Table S1**
